# Supplementary material for: Risk, Predictors, and Outcomes of Acute Kidney Injury in Patients Admitted to Intensive Care Units in Egypt
Source: PubMed Central journal article supplement (PMC5719418; doi:10.1038/s41598-017-17264-7), 2017-12-07
Supplement: 41598_2017_17264_MOESM1_ESM.pdf [file 41598_2017_17264_MOESM1_ESM.pdf]

## **RISK, PREDICTORS, AND OUTCOMES OF ACUTE KIDNEY INJURY IN PATIENTS ADMITTED TO INTENSIVE CARE UNITS IN EGYPT**

Samar Abd ElHafeez DrPH\*<sup>1, 2</sup>; Giovanni Tripepi\* PhD<sup>3</sup>; Robert Quinn MD, PhD, FRCPC<sup>2</sup>; Yasmine Naga MD, PhD<sup>4</sup>; Sherif Abdelmonem MD, PhD<sup>5</sup>; Mohamed AbdelHady MD, PhD<sup>6</sup>; Ping Liu PhD<sup>2</sup>; Matthew James MD, PhD<sup>7</sup>; Carmine Zoccali FASN, FNKF, FERA<sup>3</sup>; Pietro Ravani\* MD, PhD, FERA<sup>2</sup>

<sup>1</sup> Epidemiology Department, High Institute of Public health, Alexandria University, Alexandria, Egypt.

<sup>2</sup> Departments of Medicine and Community Health Sciences, University of Calgary, Calgary, Canada.

<sup>3</sup> CNR-IFC Clinical Epidemiology and Pathophysiology of Renal Diseases and Hypertension Unit, Ospedali Riuniti, Reggio Calabria, Italy.

<sup>4</sup> Internal Medicine Department (Nephrology Unit), Faculty of Medicine, Alexandria University, Alexandria, Egypt.

<sup>5</sup> Critical Care Department, Faculty of Medicine, Alexandria University, Alexandria, Egypt.

<sup>6</sup> Anesthesia and Surgical ICUs Department, Faculty of Medicine, Alexandria University, Alexandria, Egypt.

<sup>7</sup> Departments of Medicine and Community Health Sciences, Libin Cardiovascular Institute of Alberta, O'Brien Institute for Public Health, University of Calgary, Calgary, Canada.

#GT and PR co-supervised SA (post-doctoral fellow)

### **Correspondence:**

Name: Dr. Samar Abd ElHafeez

Address: High Institute of Public Health, Alexandria University, 165 ElHorreya Avenue, ElHadara, Alexandria, Egypt

Telephone: +201005052416

Email: [samarabdelhafeez.epid@gmail.com](mailto:samarabdelhafeez.epid@gmail.com)

Word count: 3362

Abstract: 199

Running title: AKI in ICUs in Egypt

**Table S1: Baseline characteristics of AKI patients at ICU admission**

| <b>Baseline characteristics</b>                | <b>No AKI at ICU admission</b> | <b>AKI at ICU admission</b> | <b>P value</b> |
|------------------------------------------------|--------------------------------|-----------------------------|----------------|
| <b>Number of patients</b>                      | 321 (60.3)                     | 211 (39.7)                  |                |
| <b>Age (years)</b>                             | 40 (28-75)                     | 53 (32-67)                  | <0.001         |
| <b>Male (%)</b>                                | 134 (41.7)                     | 88 (41.7)                   | 0.99           |
| <b>Ex-smokers (%)</b>                          | 36 (11.2)                      | 28 (13.3)                   | 0.48           |
| <b>Current smokers (%)</b>                     | 39 (12.1)                      | 22 (10.4)                   | 0.54           |
| <b>Marital status</b>                          |                                |                             |                |
| Single (%)                                     | 54 (16.8)                      | 17 (8.1)                    |                |
| Married (%)                                    | 256 (79.8)                     | 180 (85.3)                  | 0.10           |
| Divorced (%)                                   | 4 (1.2)                        | 0                           | 0.10           |
| Widowed (%)                                    | 7 (1.2)                        | 14 (6.6)                    | 0.01           |
| <b>Education</b>                               |                                |                             |                |
| Received some forms of education               | 232 (72.3)                     | 118 (55.9)                  | <0.001         |
| <b>Residence</b>                               |                                |                             |                |
| Urban                                          | 163 (50.8)                     | 110 (52.1)                  | 0.95           |
| Rural                                          | 158 (49.2)                     | 101(47.9)                   |                |
| <b>Type of ICU unit</b>                        |                                |                             |                |
| Surgical                                       | 217 (67.6)                     | 93 (44.1)                   | <0.001         |
| Medical                                        | 104 (32.4)                     | 118 (55.9)                  |                |
| <b>Co- morbidities</b>                         |                                |                             |                |
| Diabetics                                      | 58 (18.1)                      | 65 (30.8)                   | <0.001         |
| Cancer                                         | 48 (15)                        | 17 (8.1)                    | 0.02           |
| Liver disease                                  | 24 (7.5)                       | 30 (14.2)                   | 0.01           |
| CVD                                            | 116 (36.1)                     | 119 (56.4)                  | <0.001         |
| Pre-existing CKD                               | 0                              | 60 (28.4)                   | <0.001         |
| COPD                                           | 19 (3)                         | 7 (3)                       | 0.17           |
| <b>History of sepsis at hospital admission</b> | 44 (13.7)                      | 72 (34.1)                   | <0.001         |
| <b>Severity of sepsis</b>                      |                                |                             |                |
| Severe sepsis                                  | 29(65.9)                       | 31(43.1)                    |                |
| Septic shock                                   | 9(20.5)                        | 35(48.6)                    |                |
| <b>Reason for ICU admission</b>                |                                |                             |                |
| Pulmonary                                      | 32 (10)                        | 43 (20.4)                   | 0.001          |
| GIT                                            | 36 (11.2)                      | 24 (11.2)                   | 0.96           |
| CVD                                            | 24 (7.5)                       | 31 (14.7)                   | 0.009          |
| Malignancies                                   | 49 (15.3)                      | 5 (2.4)                     | <0.001         |
| Infection                                      | 4 (1.2)                        | 20 (9.5)                    | <0.001         |
| Neurologic                                     | 50 (15.6)                      | 26 (12.3)                   | 0.29           |
| Trauma                                         | 57 (17.8)                      | 18 (8.5)                    | 0.003          |
| Obstetric/gynecological disorders              | 36 (11.2)                      | 28 (13.3)                   | 0.50           |
| Others                                         | 33 (10.3)                      | 16 (7.6)                    | 0.29           |
| <b>Previous use of vasopressors</b>            | 40 (12.5)                      | 71 (33.6)                   | <0.001         |
| <b>Previous use of diuretics</b>               | 27 (8.4)                       | 47 (22.3)                   | <0.001         |

|                                            |             |            |       |
|--------------------------------------------|-------------|------------|-------|
| <b>Previous use of Ca channel blockers</b> | 14 (4.4)    | 22 (10.4)  | 0.008 |
| <b>Previous use of ACEI</b>                | 38 (11.4)   | 30 (14.8)  | 0.42  |
| <b>Previous use of ARB</b>                 | 5 (1.6)     | 10 (4.7)   | 0.03  |
| <b>Previous use of NSAIDs</b>              | 97 (30.2)   | 51 (24.2)  | 0.13  |
| <b>BMI (Kg/m<sup>2</sup>)</b>              | 28.42±11.16 | 29.33±9.90 | 0.88  |
| <b>Length of ICU stay in days</b>          | 7 (3-12)    | 6 (3-11)   | 0.51  |

AKI: Acute kidney injury, CVD: Cardiovascular diseases, CKD: Chronic kidney disease, COPD: Chronic obstructive pulmonary disease, GIT: Gastrointestinal tract, ACEI: Angiotensin converting enzyme inhibitors, ARB: Angiotensin receptor blockade, NSAIDs: Non-steroidal anti-inflammatory drugs, BMI: Body mass index, ICU: Intensive care units

\*Previous use refers to the use at the time of ICU admission

**Table S2: Clinical characteristics of AKI at ICU admission (study entry; N=211)**

| <b>Clinical characteristics</b>                  | <b>Frequencies</b> |
|--------------------------------------------------|--------------------|
| <b>AKI stages</b>                                |                    |
| Stage 1                                          | 47 (22.2)          |
| Stage 2                                          | 105 (49.8)         |
| Stage 3                                          | 59 (28)            |
| <b>Mechanical ventilation</b>                    | 119 (56.4%)        |
| <b>FiO2 (%)</b>                                  | 40 (21-60)         |
| <b>PaO2</b>                                      | 80 (67-98)         |
| <b>Vasactive therapy</b>                         | 71 (33.6)          |
| <b>Glasgow coma score</b>                        | 12 (8-15)          |
| <b>APACHE II</b>                                 | 20.67±8.46         |
| <b>Platelets (x10<sup>3</sup>/μl)</b>            | 188 (130-257)      |
| <b>Urine output(ml/kg/hr)</b>                    | 0.49 (0.28-1.05)   |
| <b>ALT (U/L)</b>                                 | 29 (19-84)         |
| <b>AST (U/L)</b>                                 | 40 (23-84)         |
| <b>Serum creatinine at ICU admission (mg/dl)</b> | 1.84 (1.25-3.80)   |
| <b>Serum creatinine at ICU discharge (mg/dl)</b> | 0.82 (0.65-1.20)   |
| <b>Na(mmol/l)</b>                                | 137±7.72           |
| <b>K(mmol/l)</b>                                 | 4.1±0.85           |
| <b>Blood urea (mmol/l)</b>                       | 4.34 (2.67-7.18)   |

AKI: Acute kidney injury, ALT: Alanine aminotransferase, AST: Aspartate aminotransferase, APACHE II: Acute Physiology and Chronic Health Evaluation

\*Use of mechanical ventilation during the whole ICU stay

**Table S3: Baseline characteristics for AKI after ICU admission**

| <b>Baseline characteristics</b>                | <b>AKI free</b> | <b>AKI after ICU admission</b> | <b>P value</b> |
|------------------------------------------------|-----------------|--------------------------------|----------------|
| <b>Number of patients</b>                      | 201 (62.6)      | 120 (37.4)                     |                |
| <b>Age (years)</b>                             | 38 (27-54)      | 46 (34-62)                     | 0.01           |
| <b>Male (%)</b>                                | 74 (36.8)       | 60 (50)                        | 0.02           |
| <b>Ex-smokers (%)</b>                          | 14 (7)          | 22 (18.3)                      | 0.002          |
| <b>Current smokers (%)</b>                     | 27 (13.4)       | 12 (10.1)                      | 0.36           |
| <b>Marital status</b>                          |                 |                                |                |
| Single (%)                                     | 36 (17.8)       | 18 (15.1)                      |                |
| Married (%)                                    | 159 (79.1)      | 97 (80.8)                      | 0.71           |
| Divorced (%)                                   | 2 (1)           | 2 (1.7)                        | 0.60           |
| Widowed (%)                                    | 4 (2)           | 3 (2.5)                        | 0.76           |
| <b>Education</b>                               |                 |                                |                |
| Received some forms of education               | 147 (73.1)      | 85 (70.6)                      | 0.66           |
| <b>Residence</b>                               |                 |                                |                |
| Urban                                          | 97 (48.3)       | 66 (55)                        | 0.24           |
| Rural                                          | 104 (51.7)      | 54 (45)                        |                |
| <b>Type of ICU unit</b>                        |                 |                                |                |
| Surgical                                       | 146 (72.6)      | 71 (59.2)                      | 0.01           |
| Medical                                        | 55 (27.4)       | 50 (40.8)                      |                |
| <b>Co- morbidities</b>                         |                 |                                |                |
| Diabetics                                      | 32 (15.9)       | 26 (21.7)                      | 0.20           |
| Cancer                                         | 31 (15.4)       | 17 (14.2)                      | 0.76           |
| Liver disease                                  | 11 (5.5)        | 13 (10.8)                      | 0.08           |
| CVD                                            | 63 (31.3)       | 53 (44.2)                      | 0.02           |
| COPD                                           | 10 (5)          | 9 (8)                          | 0.35           |
| <b>History of sepsis at hospital admission</b> | 23 (11.4)       | 21 (17.5)                      | 0.13           |
| <b>Severity of sepsis</b>                      |                 |                                |                |
| Severe sepsis                                  | 16 (69.6)       | 13 (61.9)                      |                |
| Septic shock                                   | 3 (13)          | 6 (28.6)                       |                |
| <b>Reason for ICU admission</b>                |                 |                                |                |
| Pulmonary                                      | 17 (8.5)        | 15 (12.5)                      | 0.24           |
| GIT                                            | 24 (11.9)       | 12 (10.0)                      | 0.59           |
| CVD                                            | 11 (5.5)        | 13 (10.8)                      | 0.08           |
| Malignancies                                   | 31 (15.4)       | 18 (15.0)                      | 0.92           |
| Infection                                      | 2 (1)           | 2 (1.7)                        | 0.60           |
| Neurologic                                     | 29 (14.4)       | 21 (17.5)                      | 0.46           |
| Trauma                                         | 38 (18.9)       | 19 (15.8)                      | 0.49           |
| Obstetric/ gynecological disorders             | 28 (13.9)       | 8 (6.7)                        | 0.04           |
| Others                                         | 21 (10.4)       | 12 (10.1)                      | 0.90           |
| <b>Previous use of vasopressors</b>            | 18 (9)          | 22 (18.3)                      | 0.01           |
| <b>Previous use of diuretics</b>               | 11 (5.5)        | 16 (13.3)                      | 0.01           |
| <b>Previous use of Ca channel</b>              | 6 (3)           | 8 (6.7)                        | 0.12           |

|                                   |             |            |        |
|-----------------------------------|-------------|------------|--------|
| <b>blockers</b>                   |             |            |        |
| <b>Previous use of ACEI</b>       | 21 (10.4)   | 17 (14.2)  | 0.32   |
| <b>Previous use of ARB</b>        | 5 (2.5)     | 0 (0)      | 0.08   |
| <b>Previous use of NSAIDs</b>     | 55 (27.4)   | 42 (35)    | 0.15   |
| <b>BMI (Kg/m<sup>2</sup>)</b>     | 28.29±12.70 | 28.66±7.21 | 0.78   |
| <b>APACHE II</b>                  | 12.23±5.66  | 15.46±5.54 | <0.001 |
| <b>Length of ICU stay in days</b> | 5 (2-10)    | 9 (5-15)   | <0.001 |

CVD: Cardiovascular diseases, CKD: Chronic kidney disease, COPD: Chronic obstructive pulmonary disease, ACEI: Angiotensin converting enzyme inhibitors, ARB: Angiotensin receptor blockade, NSAIDs: Non-steroidal anti-inflammatory drugs, BMI: Body mass index, APACHE II: Acute Physiology and Chronic Health Evaluation

\*Previous use refers to the use at the time of ICU admission

**Table S4: Clinical characteristics of AKI after ICU admission (N=120)**

| <b>Clinical characteristics</b>                  | <b>Frequencies</b> |
|--------------------------------------------------|--------------------|
| <b>AKI stages</b>                                |                    |
| Stage 1                                          | 89 (74.2)          |
| Stage 2                                          | 19 (15.8)          |
| Stage 3                                          | 12 (10)            |
| <b>Mechanical ventilation</b>                    | 78 (65.5)          |
| <b>FiO2 (%)</b>                                  | 40 (38-53)         |
| <b>PaO2</b>                                      | 93 (82-93)         |
| <b>Vasactive therapy</b>                         | 44 (30.6)          |
| <b>Glasgow coma score</b>                        | 11 (9-15)          |
| <b>APACHE II</b>                                 | 15.39±5.21         |
| <b>Platelets (x10<sup>3</sup>/μl)</b>            | 208 (148-287)      |
| <b>Urine output (ml/kg/hr)</b>                   | 0.49 (0.68-1.33)   |
| <b>ALT (U/L)</b>                                 | 32 (21-60)         |
| <b>AST (U/L)</b>                                 | 41 (33-60)         |
| <b>Serum creatinine at ICU admission (mg/dl)</b> | 0.80 (0.65-1.00)   |
| <b>Serum creatinine at ICU discharge (mg/dl)</b> | 0.82 (0.65-1.20)   |
| <b>Na (mmol/l)</b>                               | 137±7.72           |
| <b>K (mmol/l)</b>                                | 4.1±0.85           |
| <b>Blood urea (mmol/l)</b>                       | 4.34 (2.67-7.18)   |

ALT: Alanine aminotransferase, AST: Aspartate aminotransferase, APACHE II: Acute Physiology and Chronic Health Evaluation

\*Use of mechanical ventilation during the whole ICU stay

**Table S5: Predictors of mortality in sensitivity analysis**

| <b>Variables</b>                  | <b>Hazard ratio</b> | <b>95% confidence interval</b> |
|-----------------------------------|---------------------|--------------------------------|
| AKI at ICU admission              | 2.29                | (1.09-4.82)                    |
| AKI after ICU admission           | 2.89                | (1.53-5.48)                    |
| Age (years)                       | 1.00                | (0.98-1.01)                    |
| Sex                               | 0.91                | (0.62-1.33)                    |
| History of CKD                    | 1.20                | (0.71-2.004)                   |
| History of diabetes mellitus      | 1.45                | (0.96-2.19)                    |
| History of cardiovascular disease | 1.22                | (0.81-1.86)                    |
| AKI stage 2 <sup>§</sup>          | 0.87                | (0.49-1.56)                    |
| AKI stage 3 <sup>§</sup>          | 0.99                | (0.80-1.21)                    |
| APACHE II                         | 1.04                | (1.01-1.07)                    |

AKI: Acute kidney injury, ICU: Intensive care unit, CKD: Chronic kidney disease, APACHE II: Acute Physiology and Chronic Health Evaluation

<sup>§</sup> AKI stage 1 is the reference group

\*In the model of mortality, both AKI and APACHE II maintained similar association with the outcome



**Table S6: KDIGO definition and staging of AKI**

| <b>AKI is diagnosed in the presence of:</b>                                                                                                                                                                                                                                                                                                                 |                                                                                                               |                                                                      |
|-------------------------------------------------------------------------------------------------------------------------------------------------------------------------------------------------------------------------------------------------------------------------------------------------------------------------------------------------------------|---------------------------------------------------------------------------------------------------------------|----------------------------------------------------------------------|
| <ul style="list-style-type: none"><li>• Increase in serum creatinine by <math>\geq 0.3</math> mg/dl within 48 hours; or</li><li>• Increase in serum creatinine to <math>\geq 1.5</math> times baseline, which is known or presumed to have occurred within the prior 7 days; or</li><li>• Urine volume <math>&lt; 0.5</math> ml/kg/h for 6 hours.</li></ul> |                                                                                                               |                                                                      |
| <b>Stage</b>                                                                                                                                                                                                                                                                                                                                                | <b>Serum creatinine</b>                                                                                       | <b>Urine output</b>                                                  |
| 1                                                                                                                                                                                                                                                                                                                                                           | 1.5–1.9 times baseline, or $\geq 0.3$ mg/dl increase                                                          | $< 0.5$ ml/kg/h for 6–12 hours                                       |
| 2                                                                                                                                                                                                                                                                                                                                                           | 2.0–2.9 times baseline                                                                                        | $< 0.5$ ml/kg/h for $\geq 12$ hours                                  |
| 3                                                                                                                                                                                                                                                                                                                                                           | 3.0 times baseline, or increase in creatinine to $\geq 4.0$ mg/dl, or initiation of renal replacement therapy | $< 0.3$ ml/kg/h for $\geq 24$ hours<br>OR anuria for $\geq 12$ hours |

KDIGO: Kidney Disease Improving Global Outcome<sup>43</sup>
